# Supplementary material for: Frequent Visits to a French Psychiatric Emergency Service: Diagnostic Variability in Psychotic Disorders
Source: Atypon-hosted journal article supplement (doi:10.1176/ps.62.8.pss6208_0966), 2011-08-01
Supplement: Boyer_DS.pdf [file Boyer_DS.pdf]

***ICD-10* main diagnostic categories of psychotic disorders**

**Non-affective psychotic disorders**

**Schizophrenia (*ICD-10* section F20)**

**Schizoaffective disorder (*ICD-10* section F25)**

**Schizophreniform disorder (*ICD-10* section F21)**

**Delusional disorder (*ICD-10* section F22)**

**Brief psychotic disorder (*ICD-10* section F23)**

**Psychotic disorder not otherwise specified (*ICD-10* section F28–F29)**

**Affective psychoses**

**Bipolar disorder with psychotic features (*ICD-10* section F312, F315)**

**Major depressive disorder with psychotic features (*ICD-10* section F323, F333)**

**Mania with psychotic symptoms (*ICD-10* section F302)**
